# Supplementary material
Source: publisher figshare collection journal article supplement (https://tandf.figshare.com/ndownloader/files/34444790)
Supplement: Supplementary file 1 [file 34444790]

**Supplementary Material for ‘The Knowledge Politics of Capacity-Building at the UNFCCC’**

**Corresponding author:**

Snigdha Nautiyal

Affiliation: School of Sustainability, Arizona State University, Tempe, AZ, USA

Email: snautiy1@asu.edu

Address: School of Sustainability, Arizona State University, 800 S. Cady Mall, Tempe, AZ

85281, USA

**Co-author:**Sonja Klinsky

Affiliation: School of Sustainability, Arizona State University, Tempe, AZ, USA

**CODEBOOK**

| **Code Label** | **Description** | **Code Type** |
| --- | --- | --- |
| Ad-Hoc Working Group on Long-term Cooperative Action | References to the UNFCCC’s Ad-Hoc Working Group on Long-term Cooperative Action (AWG-LCA) | Institute/Body |
| Adaptation | All direct references to adaptation in the data, as well as indirect references to adjustments in socioecological or economic systems to respond to the impacts of climate change | Area of Climate Action |
| Adaptation Committee | References to the UNFCCC’s Adaptation Committee (AC) | Institute/Body |
| Arts and Humanities | References to the arts and/or humanities collectively or to specific disciplines that fall under this umbrella including philosophy, languages, history, religion, music, visual and performative arts | Knowledge Discipline |
| Background/Technical Papers/Concept Notes | Documents titled ‘Background Notes’, ‘Technical Papers’ or ‘Concept Notes’ | Type of Document |
| Capacity-Building Portal | References to the Capacity-Building Portal, an online platform that collates and shares capacity-building information and resources | Institute/Body |
| CBIT | References to and documents on Capacity-Building Initiative for Transparency (CBIT) | Institute/Body |
| CGE | References to the UNFCCC’s Consultative Group of Experts (CGE) | Institute/Body |
| Climate Change Education, Training and Public Awareness | Direct references to ‘Climate Change Education, Training and Public Awareness’, as well as other discussions on formal, non-formal and informal educational initiatives/efforts, awareness-raising activities, trainings, workshops, webinars and e-learning opportunities | Areas/Themes for Capacity-Building |
| Communication and Participation-Based Capacity-Building | Direct references to ‘communication’ and ‘participation’ as well as related discussions around the need for and efforts to increase participation, collaboration, consultations and communication in climate action | Areas/Themes for Capacity-Building |
| CTCN | References to the UNFCCC’s Climate Technology Centre and Network (CTCN) | Institute/Body |
| Cultural Capacity-Building | References to the cultural dimensions of capacity-building | Areas/Themes for Capacity-Building |
| Decision Texts | Decision text documents | Type of Document |
| Disasters and Extreme Events | Discussions and references to capacity-building as it relates to understanding and adapting to disasters and extreme events related to climate change | Areas/Themes for Capacity-Building |
| Doha WP/ACE | References to and documents on the UNFCCC’s Article 6 Dialogues, Doha Work Programme, later renamed Dialogues on Action for Climate Empowerment (ACE) | Institute/Body |
| Durban Forum | References to and documents on the UNFCCC’s Durban Forum on Capacity-building | Institute/Body |
| Framework for Capacity-Building in Developing Countries | Mentions or descriptions of the Framework for Capacity-Building in Developing Countries | - |
| Framework for Capacity-Building in Economies in Transition | Mentions or descriptions of the Framework for Capacity-Building in Economies in Transition (EiTs) | - |
| GEF | References to and documents by the Global Environment Facility (GEF) | Institute/Body |
| Gender | All discussions related to gender and its myriad dimensions as it relates to capacity-building, including gender equality, gender-responsive strategies, policies, projects, activities, and the Gender Action Plan as it relates to capacity-building. Includes comments by gender-based NGOs or individuals working in any of these dimensions related to gender | Actors |
| Green Climate Fund | References to the Green Climate Fund (GCF) | Institute/Body |
| Holistic and Inclusive Capacity-Building | Capacity-building that recognizes diverse kinds of knowledge/transdisciplinarity and either names a wide range of actors or recognizes/designs for inclusivity | Areas/Themes for Capacity-Building |
| Indigenous Peoples | All discussions related to and by indigenous peoples and indigenous people’s knowledge | Actors |
| Information/Data/Knowledge Management | Capacity-building related to information/data/knowledge collection, use, management, assessment and other data-related discussions | Areas/Themes for Capacity-Building |
| Institutional Capacity-Building | Capacity-building related to designing, enhancing, assessing institutional arrangements and organizational capabilities for climate action | Areas/Themes for Capacity-Building |
| IPCC | References to the Intergovernmental Panel on Climate Change (IPCC) | Institute/Body |
| LDCs/LEG | References to Least Developed Countries (LDCs) and/or the LDC Expert Group (LEG) | Institute/Body |
| Local Communities and Indigenous People Platform | References to the UNFCCC’s Local Communities and Indigenous Peoples Platform (LCIPP) or related bodies such as its Facilitative Working Group | Institute/Body |
| Loss and Damage | References to ‘loss and damage’ or slow-onset events and related losses and displacement | Areas/Themes for Capacity-Building |
| Mainstreaming | References to mainstreaming climate change and climate action in public sector institutions/government bodies across geographical levels and the capacity-building needed to achieve it | Areas/Themes for Capacity-Building |
| Economic or Market-Based Capacity-Building | Capacity-building related to market mechanisms (e.g. pricing, emissions trading, carbon credits, taxes, subsidies etc.). In the UNFCCC, these are typically related to the Kyoto Protocol emissions trading, Clean Development Mechanism or Joint Implementation. Also includes references to the discipline of economics | Areas/Themes for Capacity-Building |
| Meeting Reports | Documents titled ‘Meeting Reports’ | Type of Document |
| Mitigation | All direct references to mitigation in the data, as well as indirect references to efforts/projects/initiatives to reduce GHG emissions or enhance sinks for mitigating climate change | Areas/Themes for Capacity-Building |
| Monitoring, Evaluation and Assessment Capacity-Building | All M&E practices and mechanisms or other assessment-related capacity-building meant to raise effectiveness of capacity-building itself or different components of climate action more broadly | Areas/Themes for Capacity-Building |
| NDCs | All references to Nationally Determined Contributions in relation to capacity-building | Areas/Themes for Capacity-Building |
| NGOs and Civil Society | All references to and comments by actors from NGOs and civil society organizations or other civisil society representatives (from international, national, regional to local/grassroots level) | Actors |
| PCCB | References to and documents by UNFCCC’s Paris Committee on Capacity-Building (PCCB) | Institute/Body |
| Presentation | Documents/data that are presentations | Type of Document |
| Private Sector | All references to and comments by actors from the private sector, including private businesses and industry | Actors |
| Progress Reports | Documents titled ‘Progress Report’ | Type of Document |
| Public Sector | All references to and comments by actors from the public sector at all levels (national, regional, state, local) | Actors |
| Research and Academia-Related Capacity-Building | Capacity-building that refers to universities and academic and research institutions or to building skills, mechanisms and processes for research needed/conducted for climate action | Areas/Themes for Capacity-Building |
| Rural-Urban | Discussions and references to urban and/or rural communities/societies in relation to capacity-building | - |
| SBI | References to and documents by the UNFCCC’s Subsidiary Body for Implementation | Institute/Body |
| SIDS | References to Small Island Developing States (SIDS), a group of 38 UN member states and 20 non-UN members/associate members of UN regional commissions | - |
| Social Sciences | References to the social sciences collectively or to specific disciplines that fall under the social sciences (psychology, anthropology, sociology, political sciences etc. excluding economics) | Knowledge Discipline |
| Standing Committee on Finance | References to the UNFCCC’s Standing Committee on Finance | Institute/Body |
| Support and Resources | All discussion related to provision of support and resources (financial and material) for capacity-building | Areas/Themes for Capacity-Building |
| Sustainable Development | All direct references to sustainable development in the data or to development that considers future generations, sustainable livelihoods and lifestyles, use of natural resources and resource distribution | - |
| Synthesis/Summary Reports | Documents titled ‘Synthesis Report’ or ‘Summary Report’ | Type of Document |
| TEC | References to the UNFCCC’s Technology Executive Committee (TEC), focused on development and transfer of low-emission and climate resilient technologies | Institute/Body |
| Technology/Technological Knowhow | All references to and discussions about the development, deployment, assessments and transfer of climate technologies and related know-how | Knowledge Discipline |
| Transparency | Discussions on transparency in the documents, including the enhanced transparency framework | Areas/Themes for Capacity-Building |
| Webpages | Documents/data that are webpages | Type of Document |
| Years | Codes for Years from 2001-2020 | Years |
| YOUNGOs/Youth/Children | All references to and comments by actors from Youth NGOs (YOUNGOs), youth/young people and/or children in relation to capacity-building | Actors |
